# Supplementary material
Source: PubMed Central journal article supplement (PMC4209491)
Supplement: Supp_Figure1.pdf [file Supp_Figure1.pdf]

## Supplementary Data

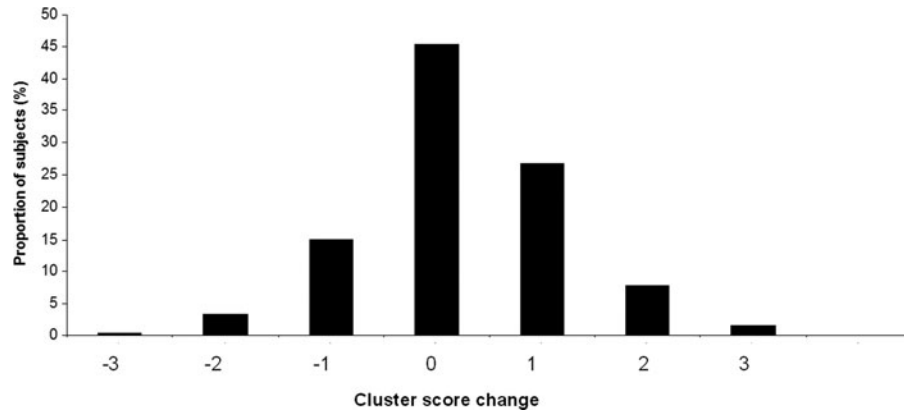

**SUPPLEMENTARY FIG. S1.** Distribution of cluster score change between baseline and 7-year follow-up.
