# Supplementary material
Source: PubMed Central journal article supplement (PMC4209491)
Supplement: Supp_Figure2.pdf [file Supp_Figure2.pdf]

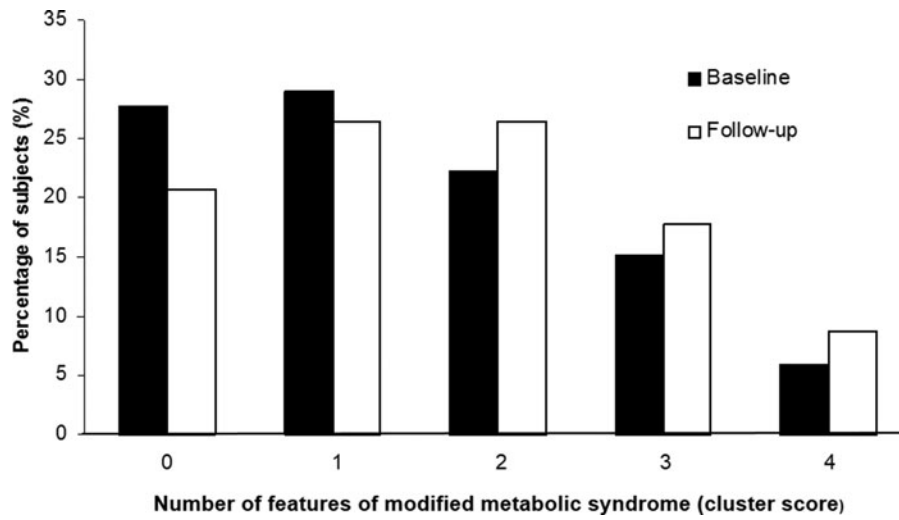

**SUPPLEMENTARY FIG. S2.** Proportion of subjects with 0–4 features of the metabolic syndrome at baseline and 7-year follow-up.
