# Supplementary material
Source: PubMed Central journal article supplement (PMC4209491)
Supplement: Supp_Table1.pdf [file Supp_Table1.pdf]

SUPPLEMENTARY TABLE S1. MULTIVARIABLE-ADJUSTED MEAN (95% CI) TRAIT SCORE CHANGE ASSOCIATED WITH A 1-QUINTILE BASELINE DIFFERENCE IN WAIST CIRCUMFERENCE OR/AND HOMA-IR, OR/AND A 1-QUINTILE CHANGE IN WAIST CIRCUMFERENCE OR/AND HOMA-IR OVER 7-YEARS

| Waist or HOMA-IR | Multivariable-adjusted mean (95% CI) trait score change                                                |                                                             |                                      |
|------------------|--------------------------------------------------------------------------------------------------------|-------------------------------------------------------------|--------------------------------------|
|                  | <i>1-quintile baseline difference or/and 1-quintile 7-year change in predictor variable considered</i> | <i>All predictors modeled individually in these columns</i> | <i>Predictors modeled in pairs</i>   |
| Waist            | Baseline difference<br>7-year change                                                                   | 0.10 (0.07–0.12)<br>0.16 (0.13–0.20)                        | 0.16 (0.13–0.18)<br>0.23 (0.20–0.27) |
| HOMA-IR          | Baseline difference<br>7-year change                                                                   | 0.09 (0.07–0.12)<br>0.16 (0.14–0.19)                        | 0.25 (0.22–0.29)<br>0.28 (0.25–0.30) |

All trait score change *P* values <0.0001 for the test that trait score change = 0. All models are adjusted for age, sex, and baseline cluster score.

In models that included individual predictors, the trait score change associated with a 1-quintile difference in baseline waist circumference was 0.10 traits, and with a 1-quintile 7-year change in waist was 0.16 traits, and with a 1-quintile difference in HOMA-IR was 0.09 traits, and with a 1-quintile change in HOMA-IR was 0.16 traits. In a model that included both baseline waist and 7-year change in waist, the trait score change associated with a 1-quintile difference in baseline waist was 0.16 traits and for 7-year change in waist was 0.23 traits. Similarly, in a model that included both baseline HOMA-IR and 7-year change in HOMA-IR, the trait score change associated with a 1-quintile difference in baseline HOMA-IR was 0.25 traits and for 7-year change in HOMA-IR was 0.28 traits. In a model that included 1-quintile baseline differences and 1-quintile prospective changes in waist and HOMA-IR, all predictors were positively associated with trait score change (waist difference: 0.06 traits, waist change: 0.13 traits, HOMA-IR difference: 0.22 traits, HOMA-IR change: 0.24 traits).

CI, confidence interval; HOMA-IR, homeostasis model assessment of insulin resistance.
